# Supplementary material for: Synthesis of bent [4]phenylene (cyclobuta[1,2-a:3,4-b′]bisbiphenylene) and structure of a bis(trimethylsilyl) derivative: the last [4]phenylene isomerElectronic supplementary information (ESI) available: selected bond distances and angles for 9, spectral and analytical information. See http://www.rsc.org/suppdata/cc/b1/b109789j/
Source: Royal Society of Chemistry journal article supplement (doi:10.1039/b109789j), 2002-01-16
Supplement: b109789j.doc [file b109789j.doc]

**Supplementary data**

**Synthesis of bent [4]phenylene (cyclobuta[1,2-*a*:3,4-b’]bisbiphenylene) and structure of a bis(trimethylsilyl) derivative : the last [4]phenylene isomer**

Dennis T.-Y. Bong, Lionel Gentric, Daniel Holmes, Adam J. Matzger, Frank Scherhag and K. Peter C. Vollhardt*

*Center for New Directions in Organic Synthesis, Department of Chemistry, University of California at Berkeley, and the Chemical Sciences Division, Lawrence Berkeley National Laboratory, Berkeley, California 94720-1460, USA*. *E-mail:* [*vollhard@cchem.berkeley.edu*](mailto:vollhard@cchem.berkeley.edu)

**Electronic Supplementary Information (ESI)**

**Figure 2** : Structure of **9** in the crystal : selected distances (Å) and angles (°), averaged over the two inequivalent molecules in the unit cell: C(1) - C(2) 1.417, C(2) - C(3) 1.441, C(3) - C(4) 1.369, C(4) - C(5) 1.409, C(5) - C(6) 1.362, C(6) - C(1) 1.438, C(4) - C(7) 1.509, C(5) - C(8) 1.515, C(7) - C(8) 1.426, C(8) - C(9) 1.381, C(9) - C(10) 1.398, C(10) - C(11) 1.418, C(11) - C(12) 1.387, C(7) - C(12) 1.389, C(10) - C(13) 1.506, C(11) - C(14) 1.500, C(13) - C(14) 1.459, C(14) - C(15) 1.345, C(15) - C(16) 1.463, C(16) - C(17) 1.350, C(17) - C(18) 1.451, C(13) - C(18) 1.358, C(15) - C(19) 1.506, C(16) - C(20) 1.503, C(19) - C(20) 1.425, C(20) - C(21) 1.377, C(21) - C(22) 1.400, C(22) - C(23) 1.390, C(23) - C(24) 1.410, C(19) - C(24) 1.359; C(7) - C(12) - C(11) 111.7, C(8) - C(9) - C(10) 111.8.

**Spectral and Analytical Information** : For **1** : orange powder, mp > 200 °C dec; 1H NMR (400 MHz), CDCl3) ** (see Fig. 1) 6.97 (m, 2H), 6.90 (m, 2H), 6.68 (m, 2H), 6.50 (m, 2H), 6.46 (d, *J* = 1.5 Hz, 1H), 6.39 (d, *J* = 1.5 Hz, 1H), 6.07 (d, *J* = 6.4 Hz, 1H), 5.94 (d, *J* = 6.4 Hz, 1H); 13C{1H} NMR (100 MHz, CDCl3) ** 152.6, 152.0, 151.1, 150.4, 150.3, 150.2, 149.5, 148.9, 148.0, 147.5, 133.9, 132.7, 128.6, 128.4, 128.3, 128.1, 119.1, 118.3, 116.3, 116.2, 113.0, 111.3, 111.2, 110.4; UV-VIS (THF) **max (*A*) 308 (0.54), 322 (0.55), 364 (0.35), 376 (0.44), 432 (0.08), 456 (0.10), 486 (0.06); MS (70 eV, FAB) *m*/*z* 300 (*M*+). HRMS (FAB) calcd for C24H12 300.0939, found 300.0936. For **9** : orange crystals, mp 159-160 °C; 1H NMR (500 MHz, CDCl3) ** (assignments by HMBC) 6.98 (m, 2H, H2, H3), 6.90 (m, 2H, H1, H4), 6.83 (m, 2H, H8, H11), 6.50 (d, *J* = 1.5 Hz, 1H, H12), 6.43 (d, *J* = 1.5 Hz, 1H, H7), 6.08 (d, *J* = 6.4 Hz, 1H, H5), 5.96 (d, *J* = 6.4 Hz, 1H, H6), 0.33 (s, 9H), 0.32 (s, 9H); 13C{1H} NMR (100 MHz, CDCl3) ** (assignments by HMQC) 153.9 (C11a), 153.2 (C7b), 151.1 (C6b), 150.2 (C4a), 149.44 (C7a, or 11b, or 12a), 149.43 (C7a, or 11b, or 12a), 149.3 (C7a, or 11b, or 12a), 149.0 (C12d), 148.3 (C9, or 10), 148.2 (C9, or 10), 148.0 (C4b), 147.6 (C6a), 133.9 (C12b), 132.7 (C12c), 128.6 (C2), 128.1 (C3), 121.5 (C8, or 11), 121.4 (C8, or 11), 119.1 (C1), 118.3 (C4), 113.0 (C5), 111.5 (C6, or 12), 111.4 (C6, or 12), 110.6 (C7), 2.10 (2C); IR (KBr) 3058, 2949, 2894, 1410, 1351, 1249, 1200, 1151, 1099, 1085, 1058, 1035, 997, 988, 854, 836, 825, 746, 645, 548, 432 cm-1; UV-Vis (CH2Cl2) **max (log** ) 253 (4.51), 273 (4.56), 317 (4.67), 328 (4.74), 369 (4.54), 382 (4.66), 436 (4.05), 460 (4.15), 486 (4.06); MS (EI, 70eV) *m*/*z* (rel intensity) 444 (100), 339 (4), 326 (4), 317 (6), 313 (4), 311 (2), 222 (0.3), 207 (1), 73 (18); anal. calcd for C30H28Si2: C, 81.02; H, 6.35. Found: C, 80.79; H, 6.39. For **10**: light yellow oil; 1H NMR (300 MHz, CD2Cl2, 25 °C) ** 7.15-7.12 (m, 2H), 7.00-6.98 (m, 2H), 6.84-6.81 (m, 2H), 6.35 (br s, 2H), 3.91-3.86 (m, 1H), 3.74-3.66 (m, 2H), 3.45-3.43 (m, 1H), 1.90-1.70 (m, 4H), 0.31 (s, 9H), 0.30 (s, 9H); 1H NMR (300 MHz, CD2Cl2, -70 °C) **  7.27-6.95 (m, 8H), 6.90 (d, *J* = 1.0 Hz, 1H), 6.80 (d, *J* = 1.0 Hz, 1H), 6.77 (d, *J* = 1.0 Hz, 1H), 6.73 (d, *J* = 1.0 Hz, 1H), 6.70 (d, *J* = 1.2 Hz, 1H), 6.36 (d, *J* = 1.2 Hz, 1H), 6.33 (d, *J* = 1.2 Hz, 1H), 6.06 (d, *J* = 1.2 Hz, 1H), 3.95 (dd, *J* = 9.6, 5.4 Hz, 1H), 3.83-3.69 (m, 5H), 3.29-3.17 (m, 2H), 2.10-1.60 (m, 8H), 0.28 (s, 9H), 0.25 (s, 9H), 0.23 (s, 9H), 0.22 (s, 9H); 13C{1H} NMR (100 MHz, CDCl3, 25 °C) ** 151.3 (2C), 151.0, 150.8 (2C), 150.7 (2C), 148.0, 147.19, 147.18, 127.0, 126.8, 122.9, 121.8, 121.7, 121.6, 114.1, 113.0, 42.1, 41.4, 40.8, 26.2, 22.1, 2.12, 2.11; IR (neat) = 2927, 1458, 1249, 1045, 1004, 839, 754, 648 cm-1; UV-VIS (CH2Cl2) **max (log**) 260sh (4.68), 264 (4.73), 342sh (3.61), 359 (3.93), 378 (4.11) nm; HRMS calcd for C30H34Si2 450.21999, found 450.2198.
